# Supplementary material for: Bisphenol A impaired cell adhesion by altering the expression of adhesion and cytoskeleton proteins on human podocytes
Source: PubMed Central journal article supplement (PMC7538920; doi:10.1038/s41598-020-73636-6), 2020-10-06

## Supplementary material

“Bisphenol A impaired cell adhesion by altering the expression of adhesion and cytoskeleton proteins on human podocytes”

Rafael Moreno-Gómez-Toledano

María I. Arenas

Clara González-Martínez

Nuria Olea-Herrero

Paula Reventún

Michele Di Nunzio

Sandra Sánchez-Esteban

Eduardo Arilla-Ferreiro

Marta Saura

Ricardo J. Bosch

Supplementary figure 1.- Vimentin

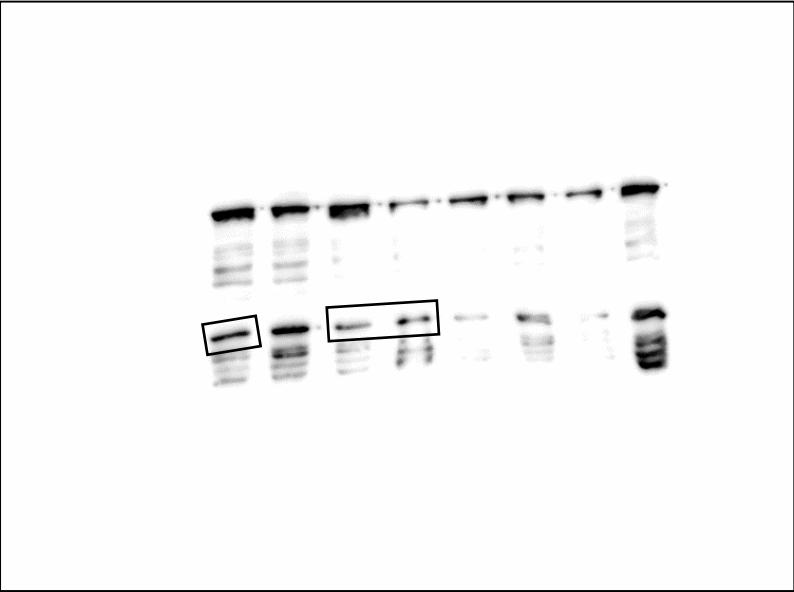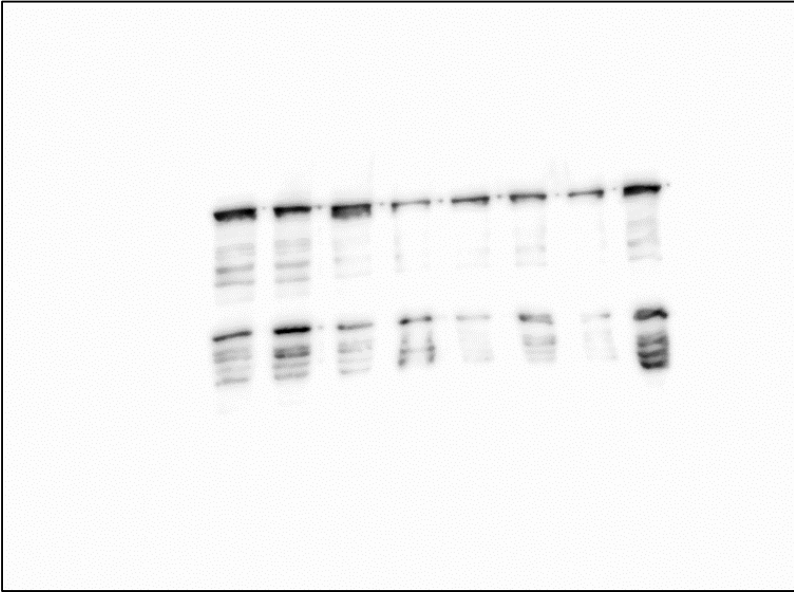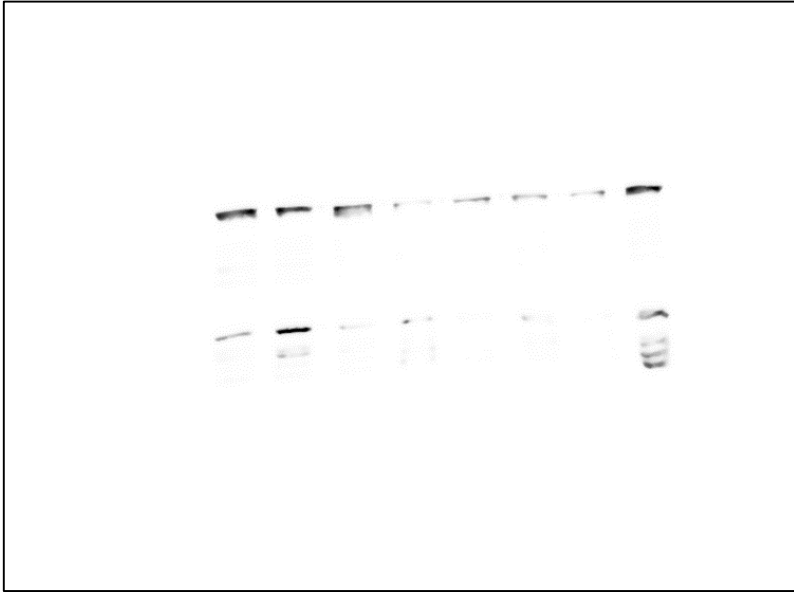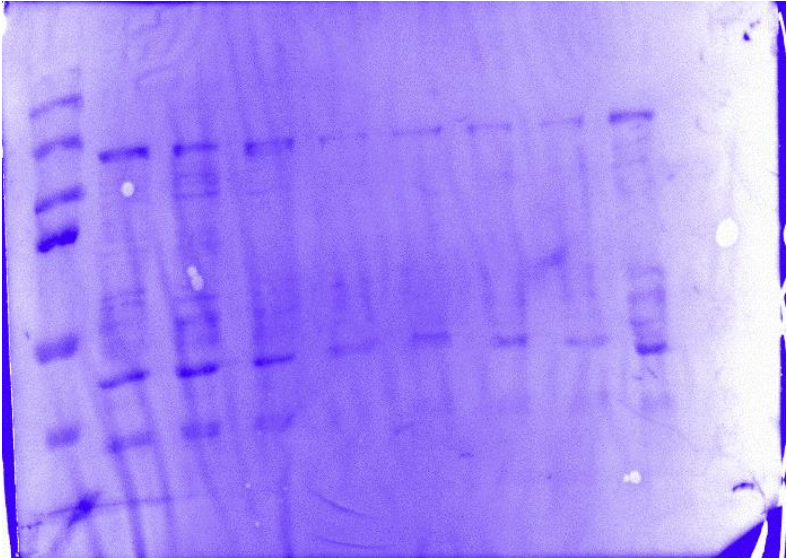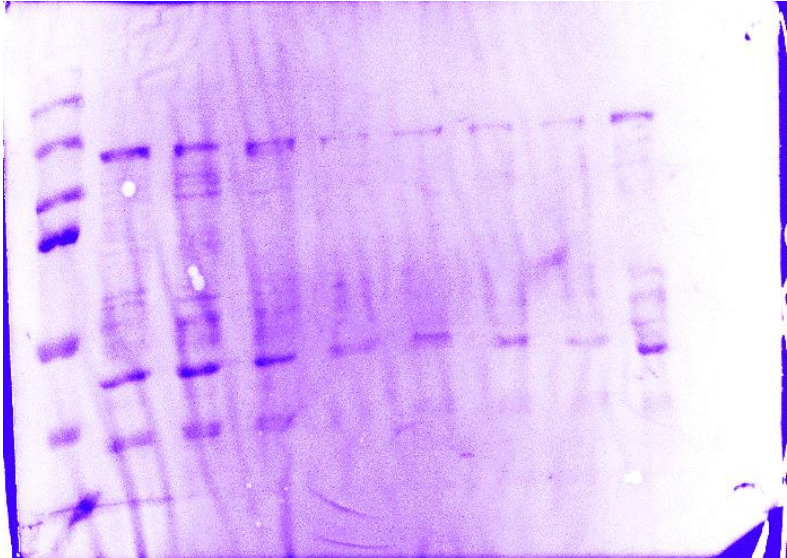

Supplementary figure 2.- Tubulin

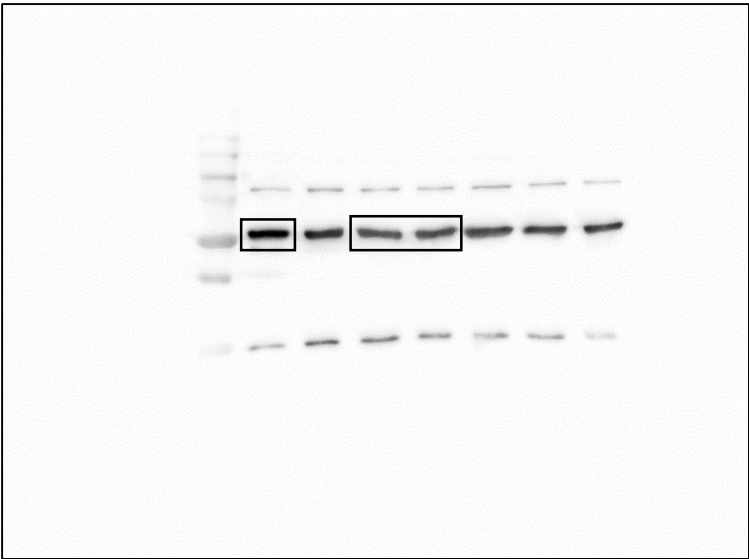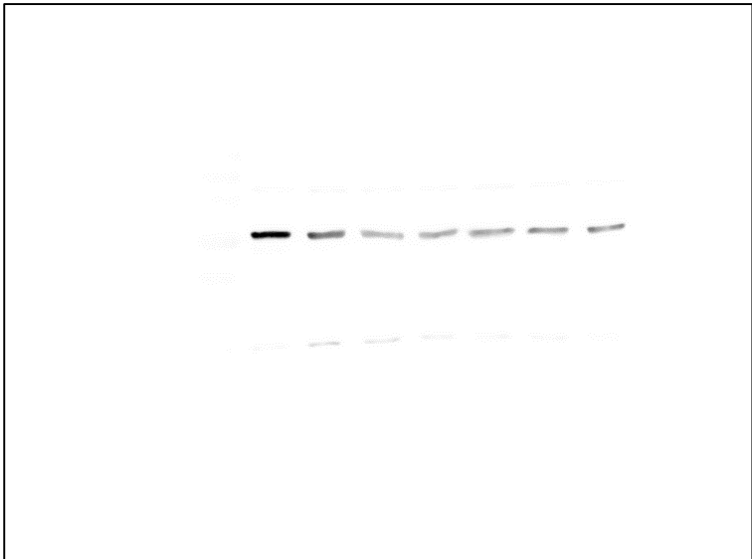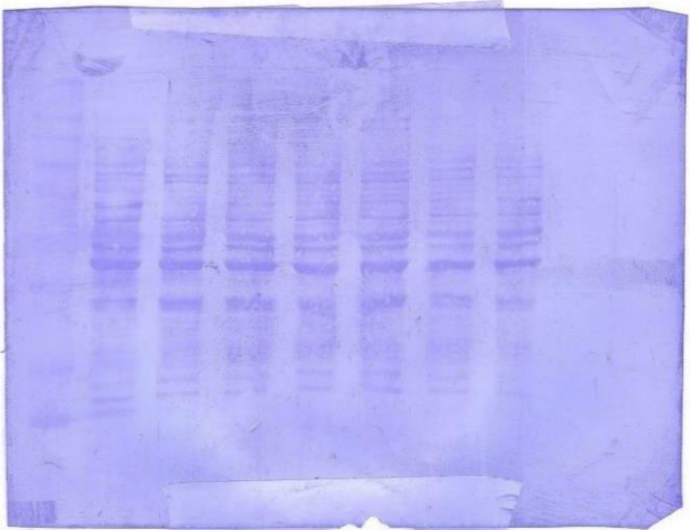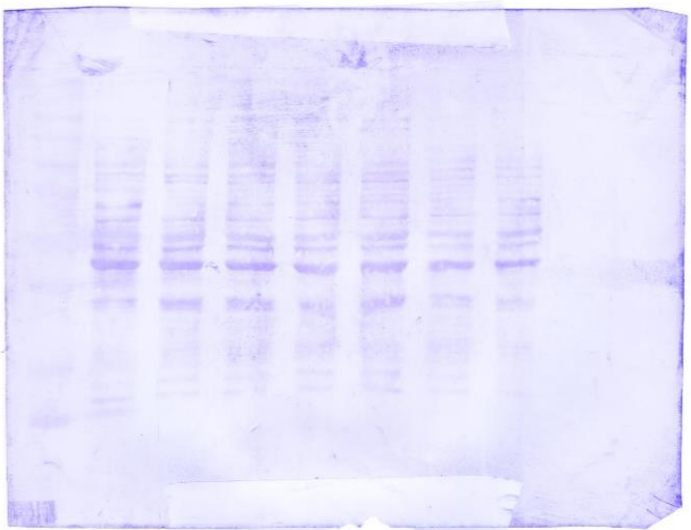

Supplementary figure 3.- Podocin

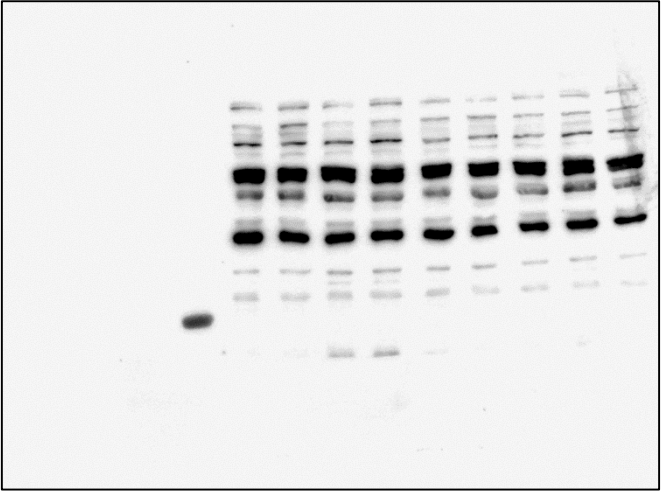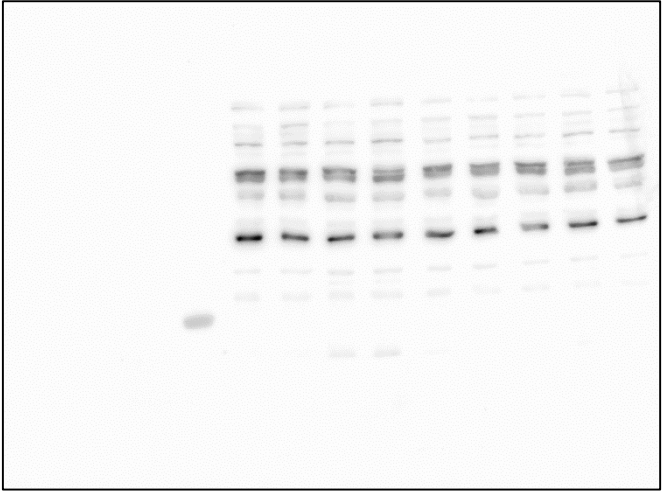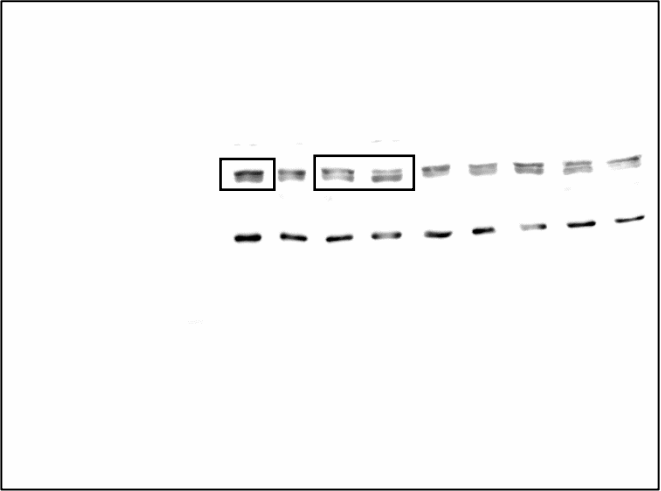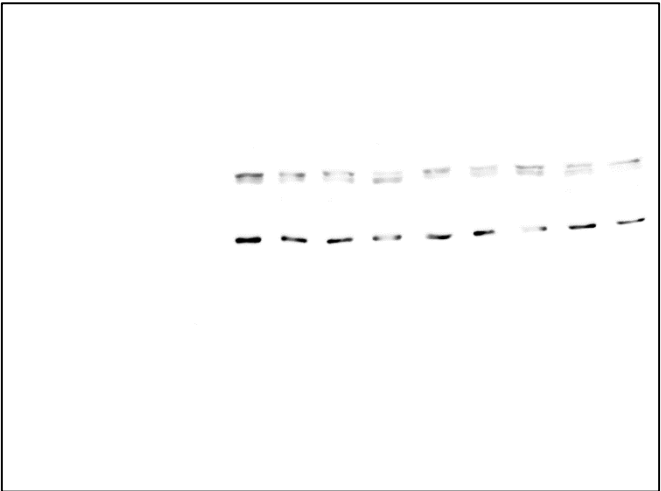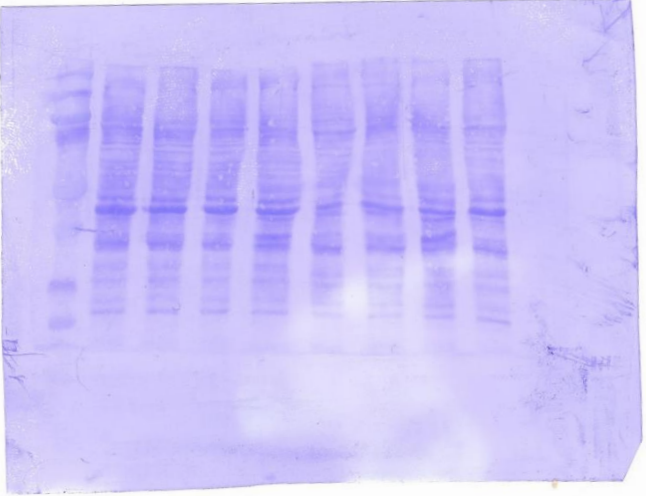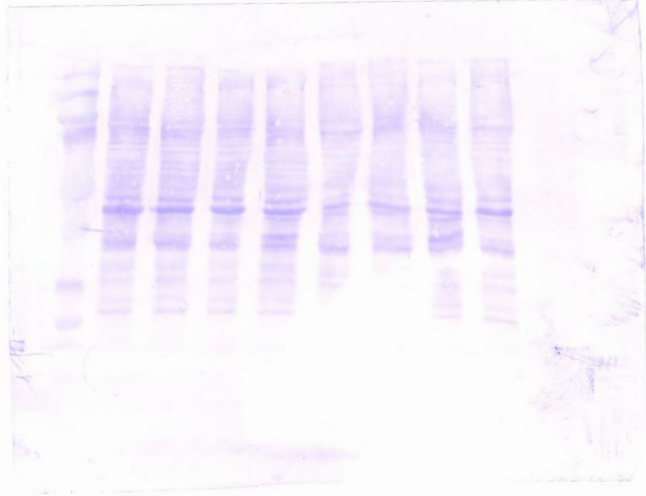



Supplementary figure 4.- Cofilin

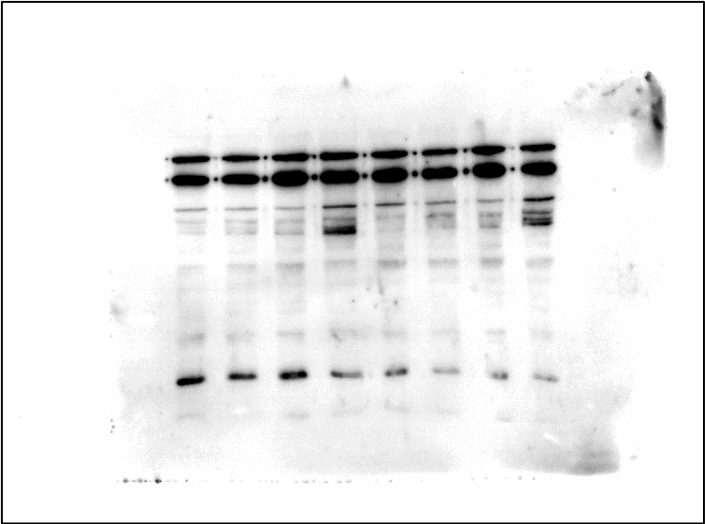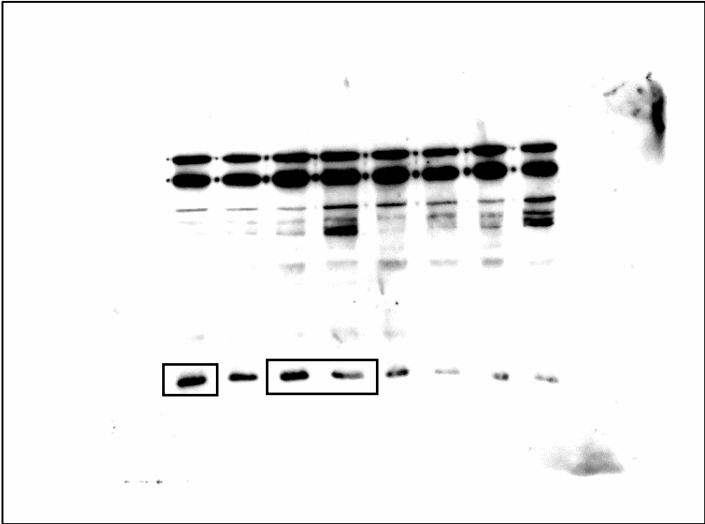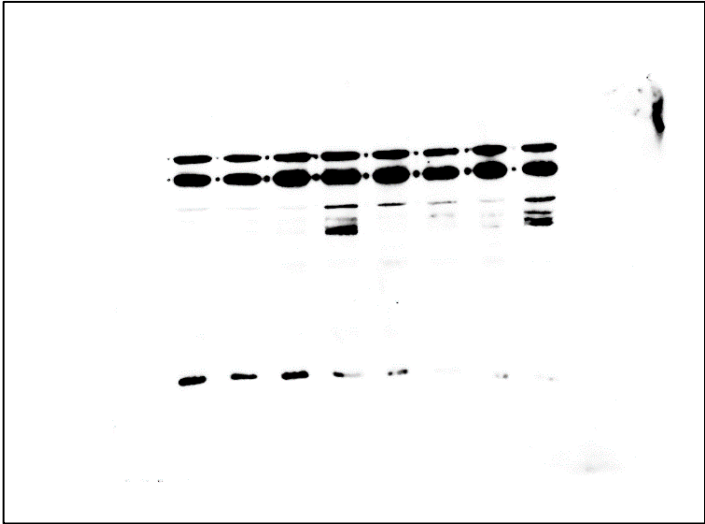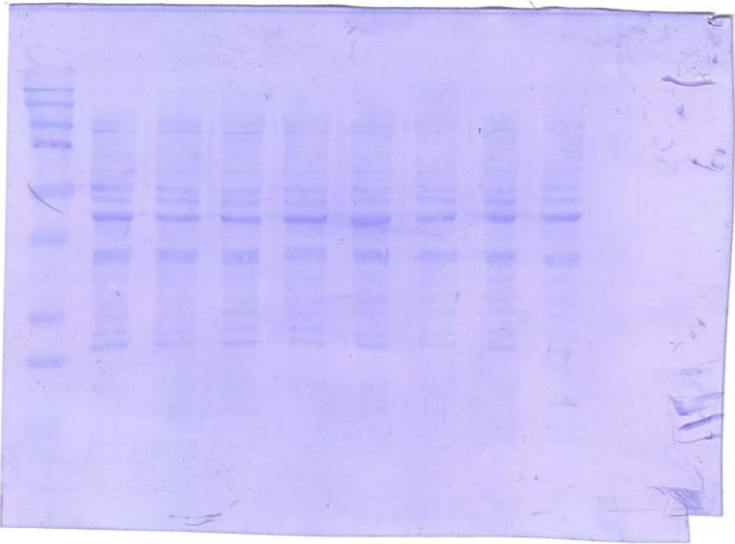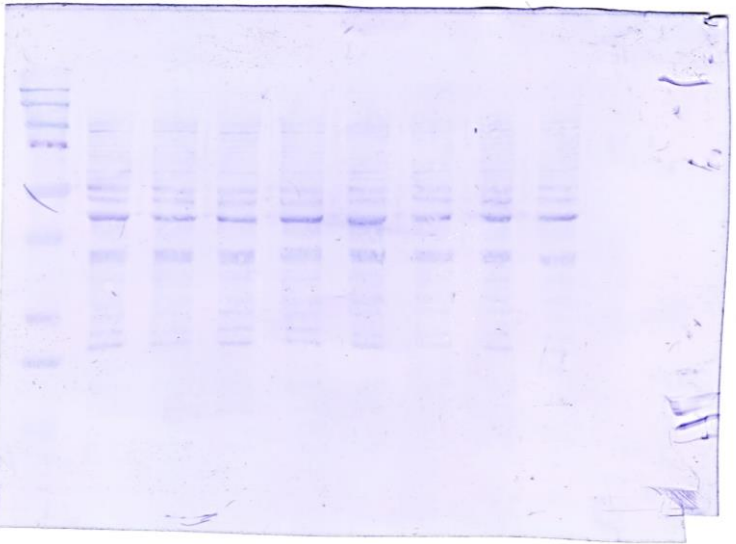

Supplementary figure 5.- Vinculin

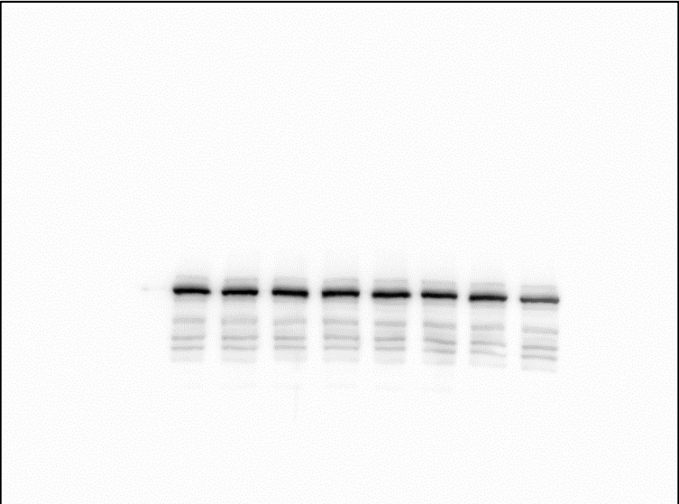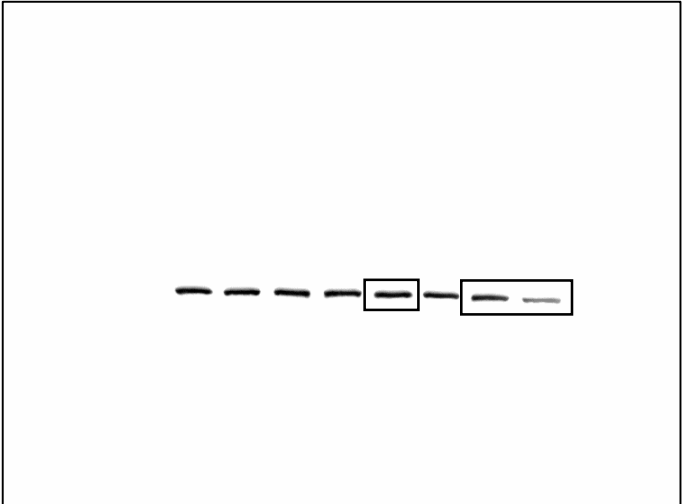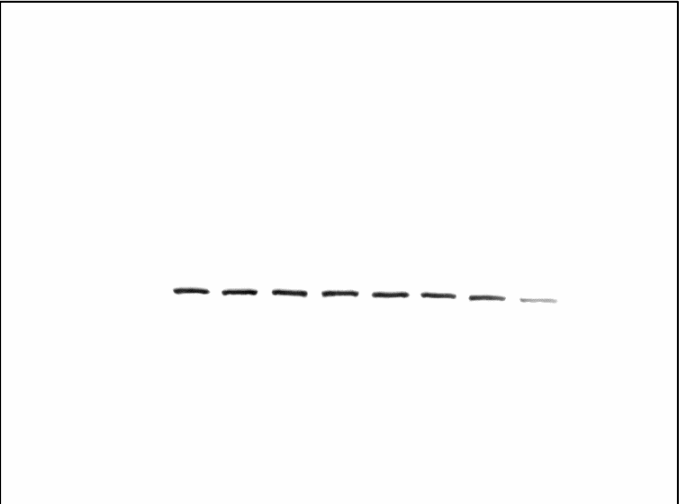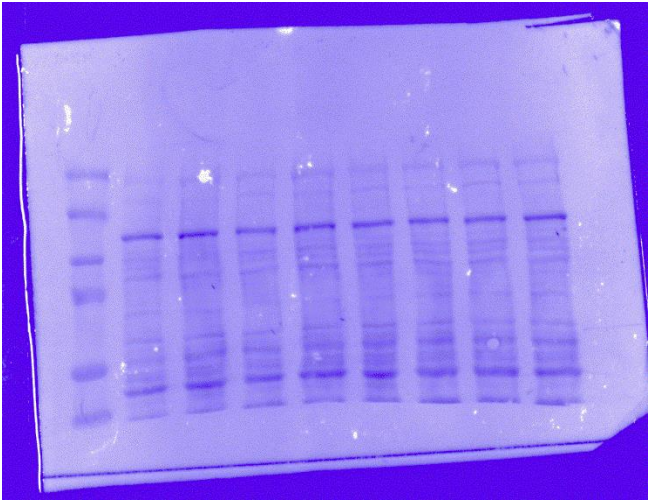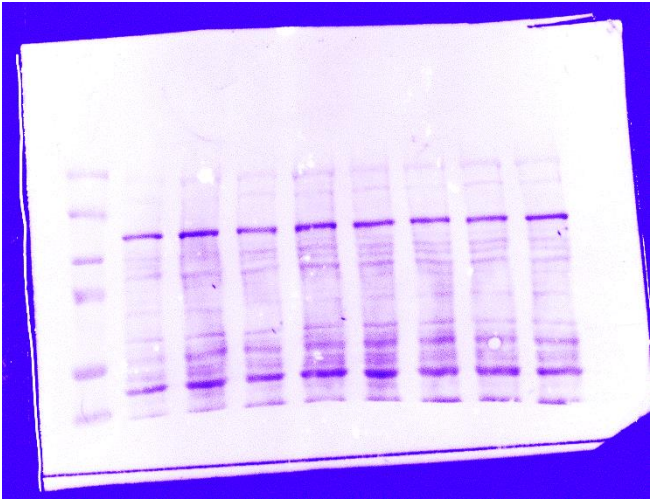

Supplementary figure 6.- E-cadherin

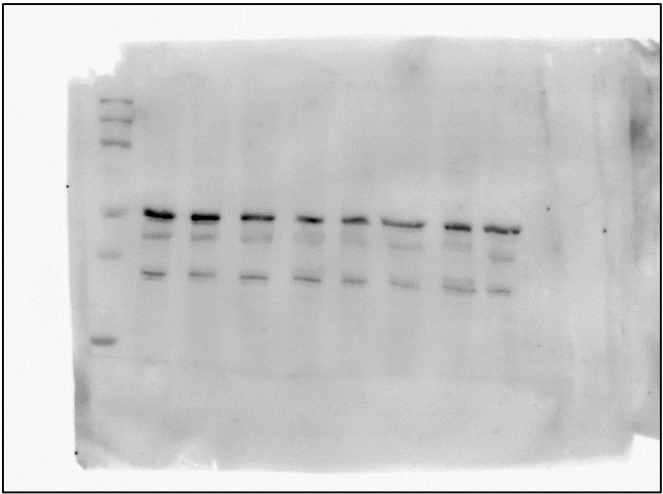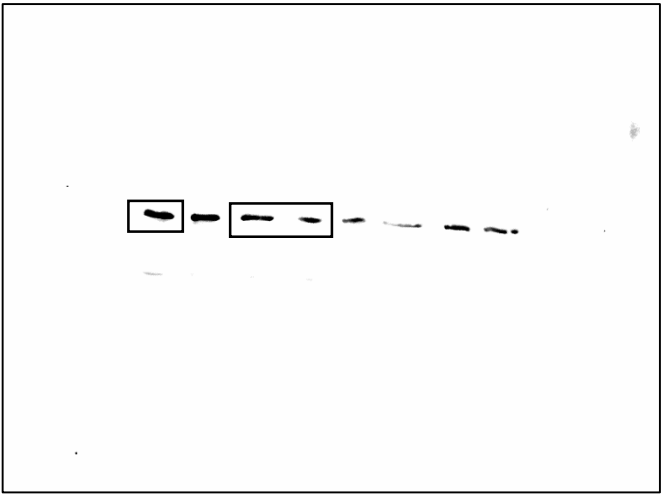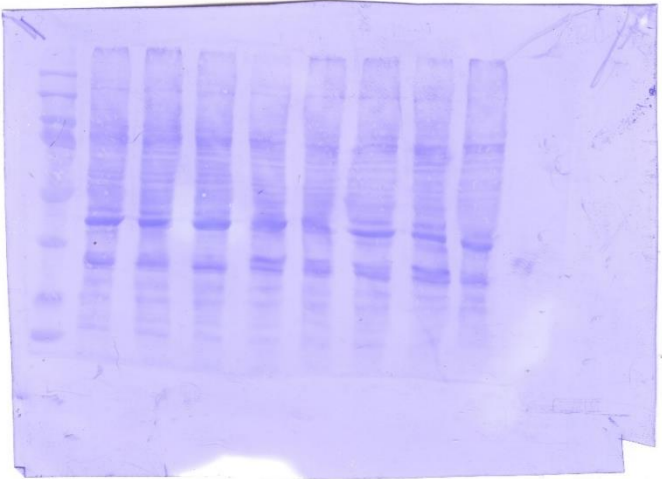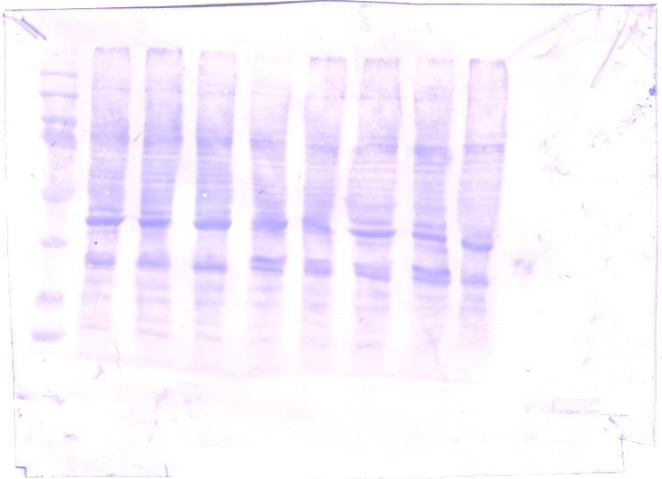

Supplementary figure 7.- Nephrin

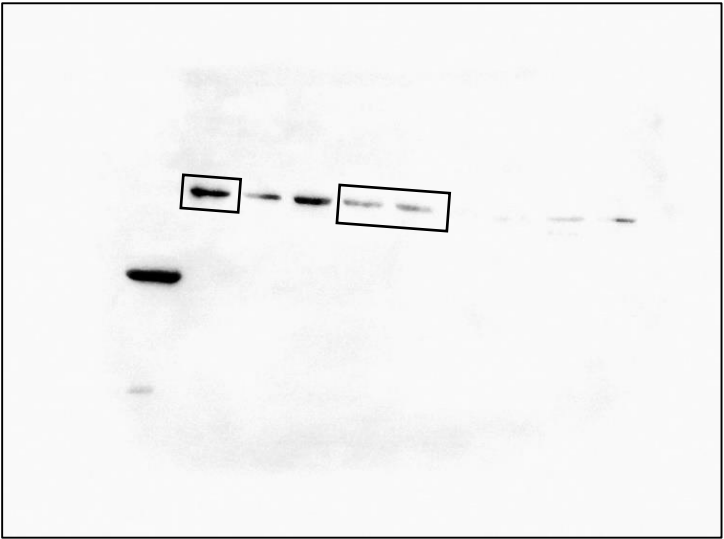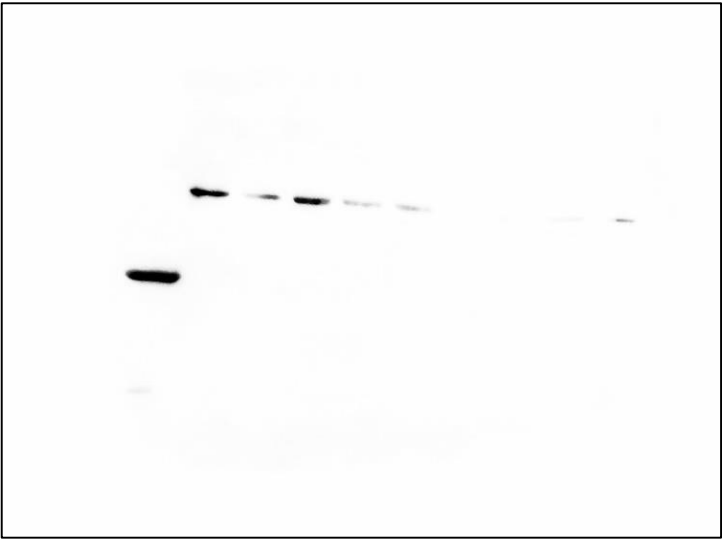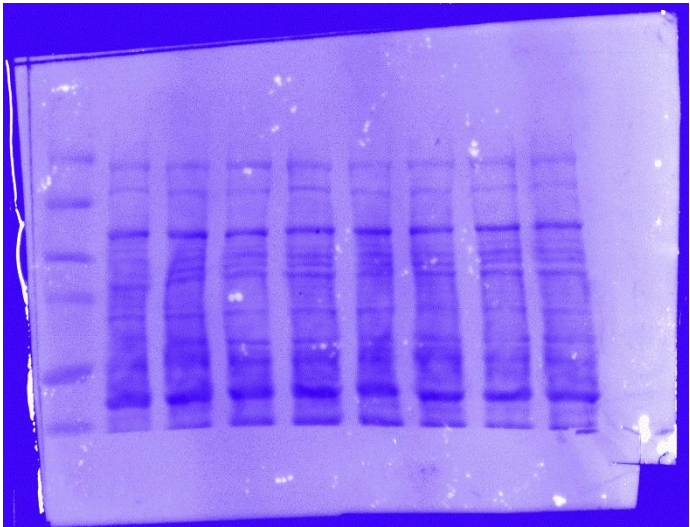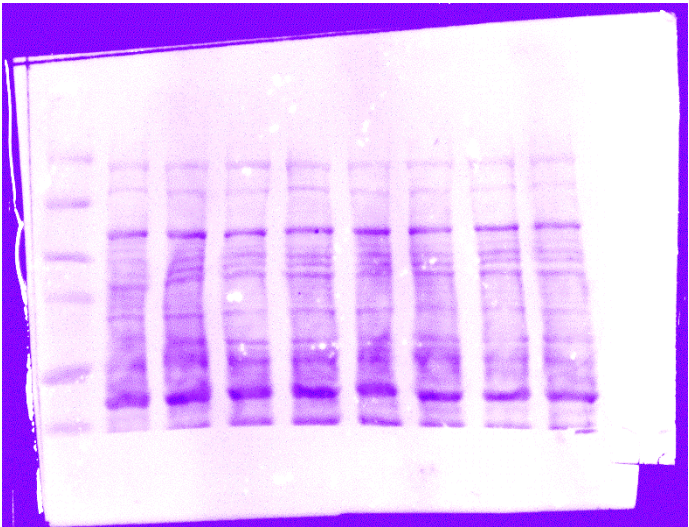



Supplementary figure 8.- V-CAM

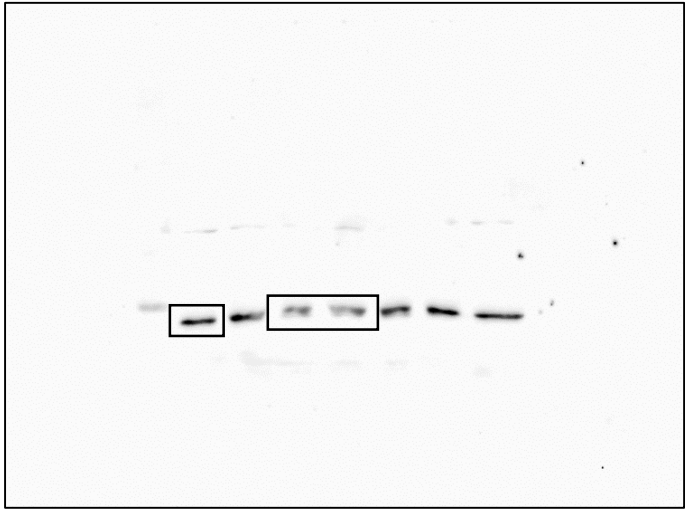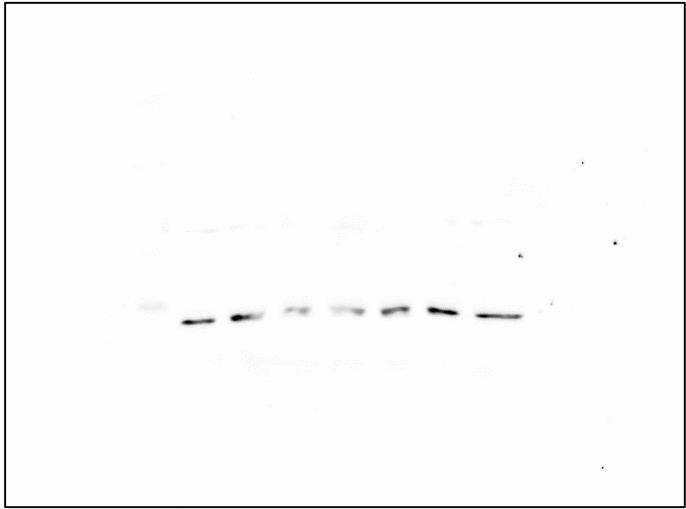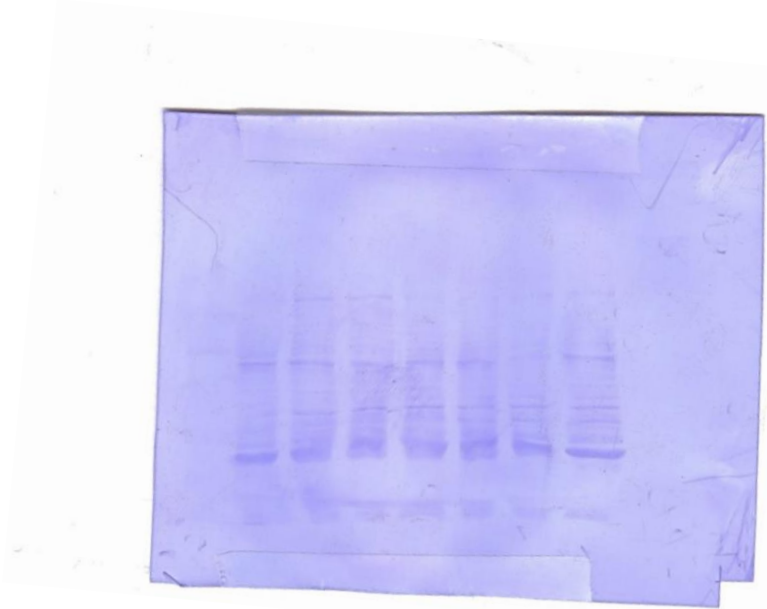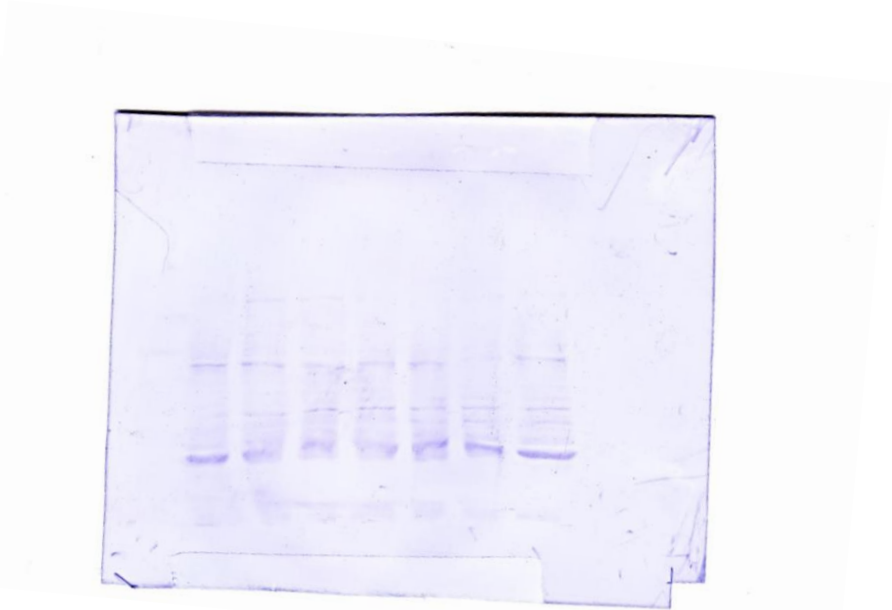

Supplementary figure 9.- Tenascin-C

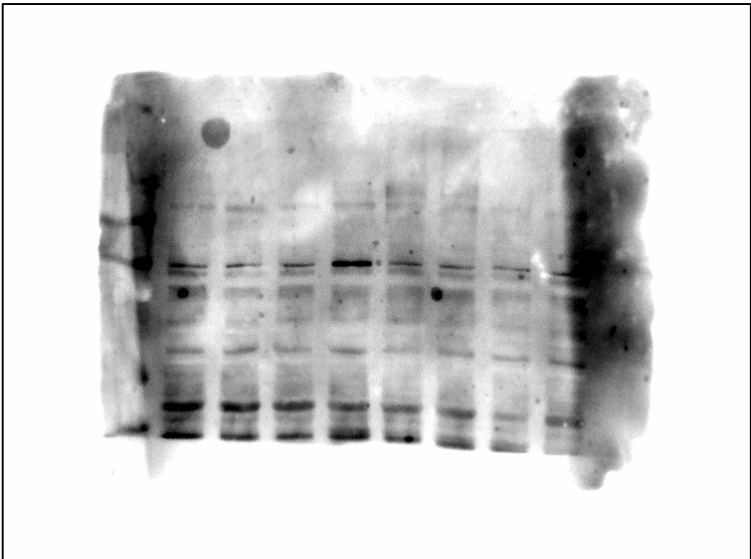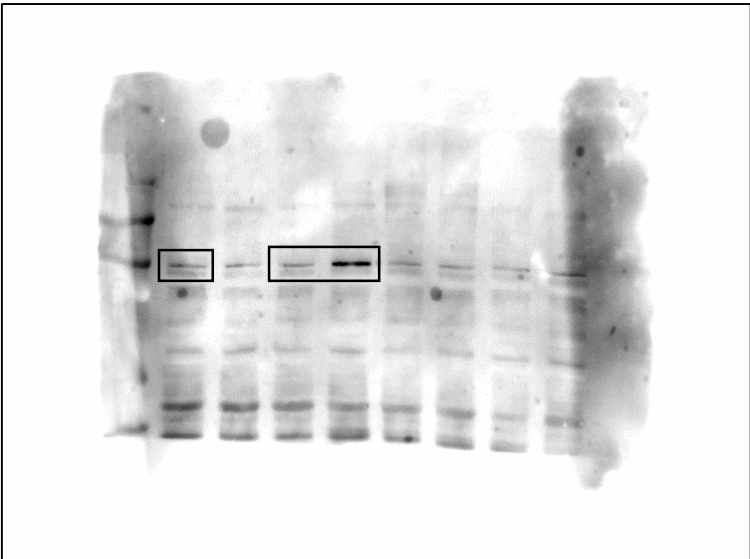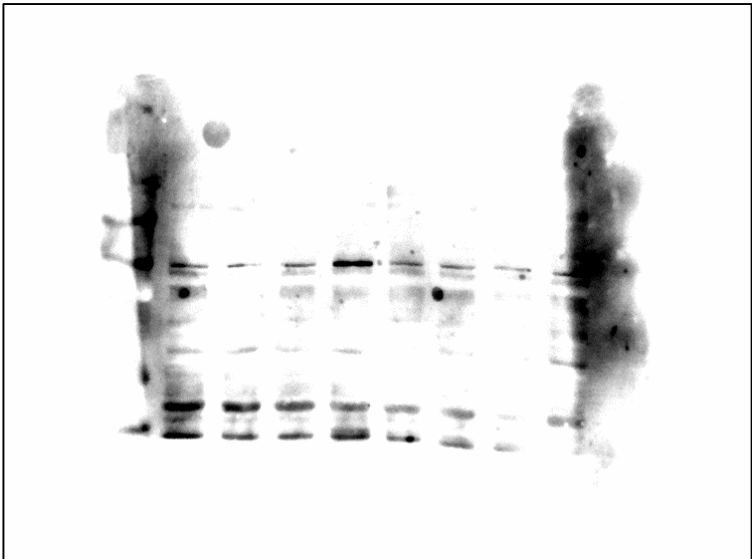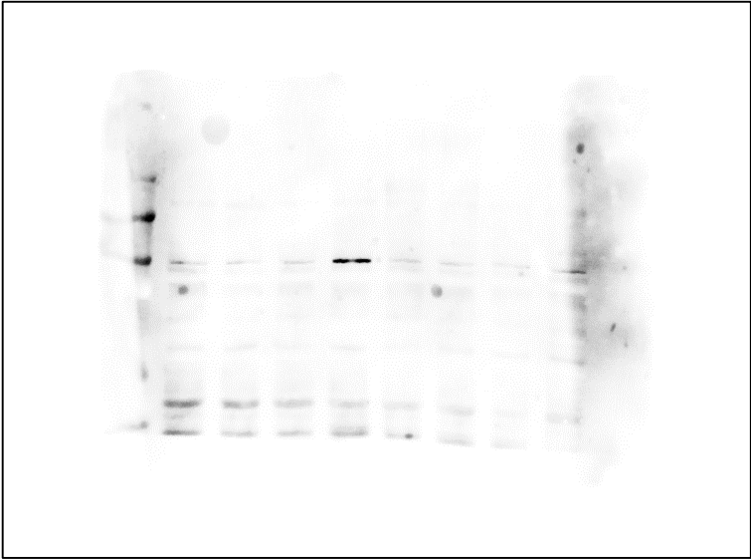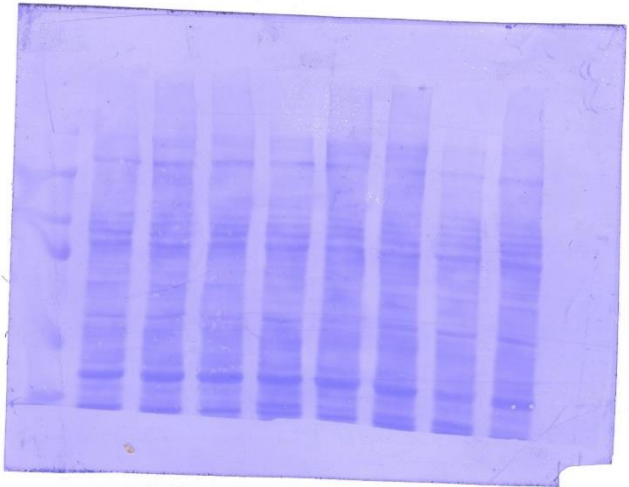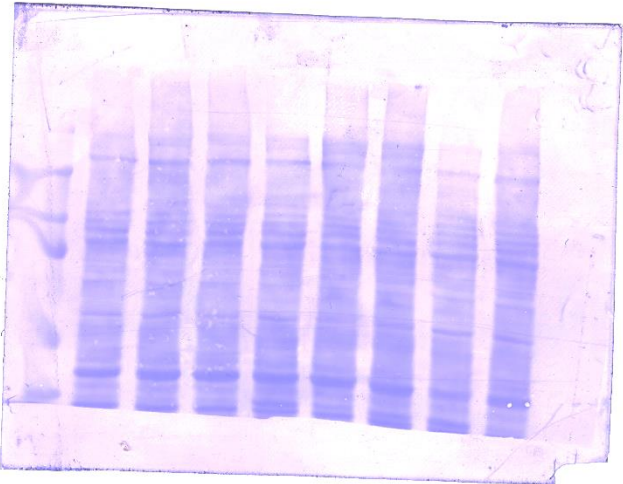

Supplementary figure 10.-  $\beta$ -catenin

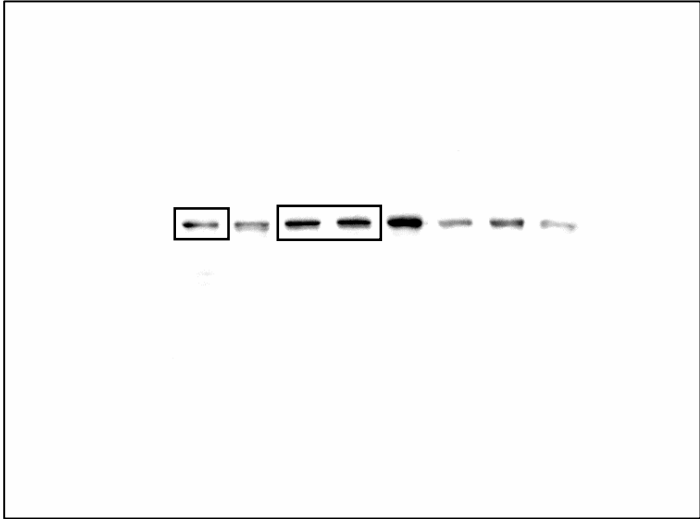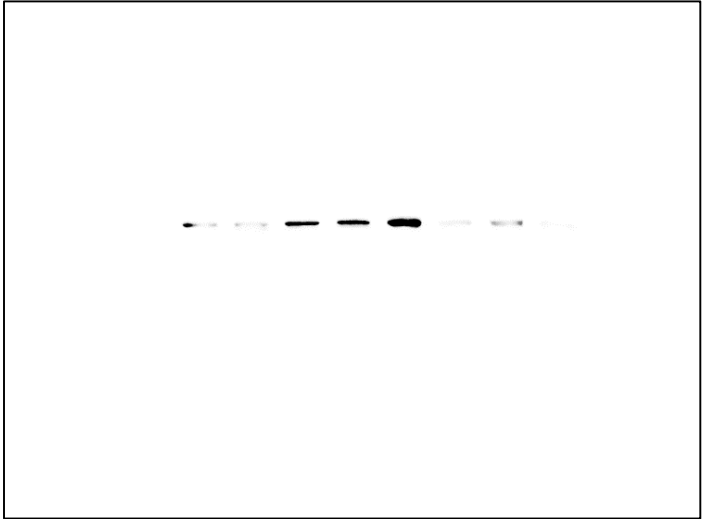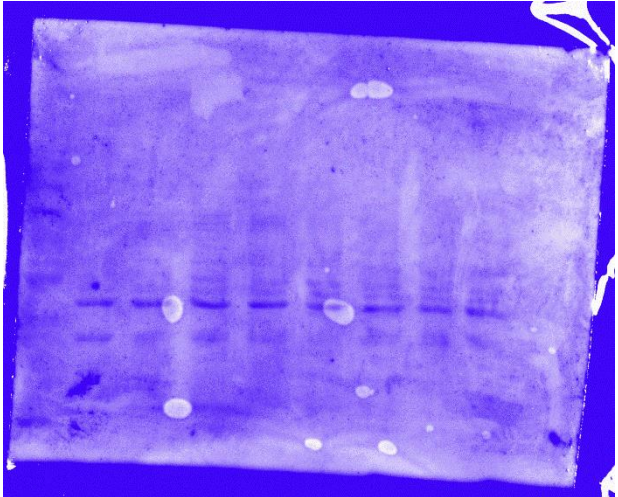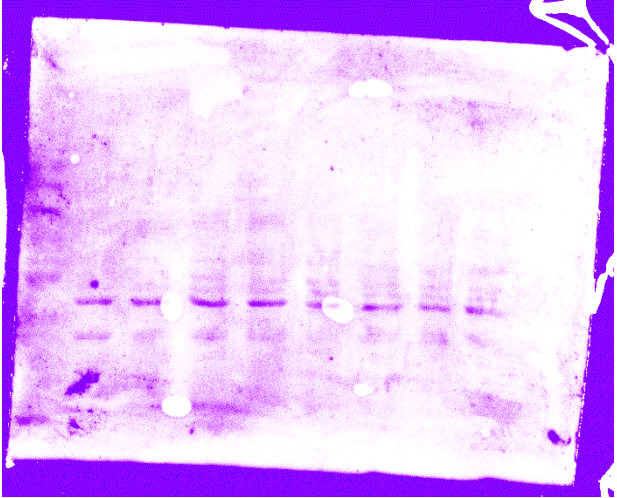

Supplementary figure 11.- V-CAM (Tamoxifen experiments)

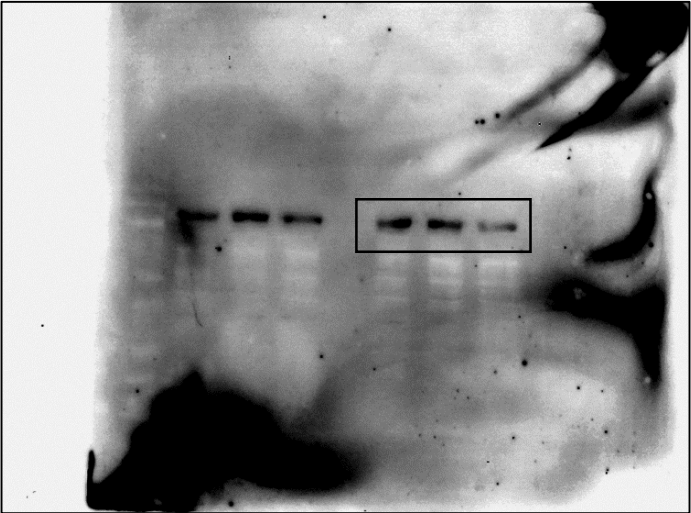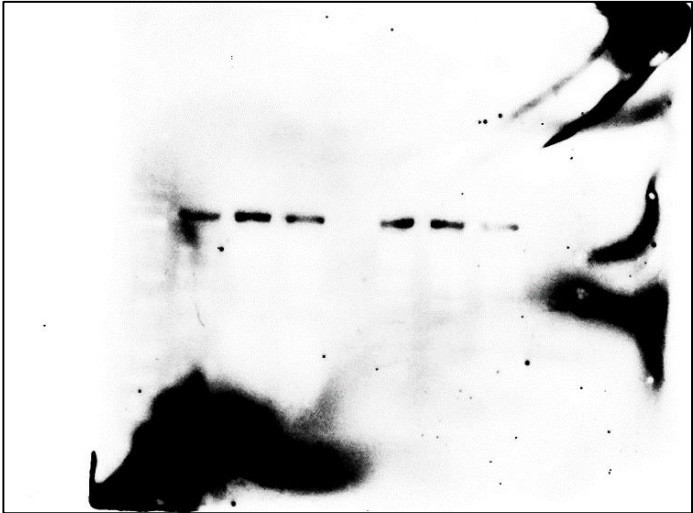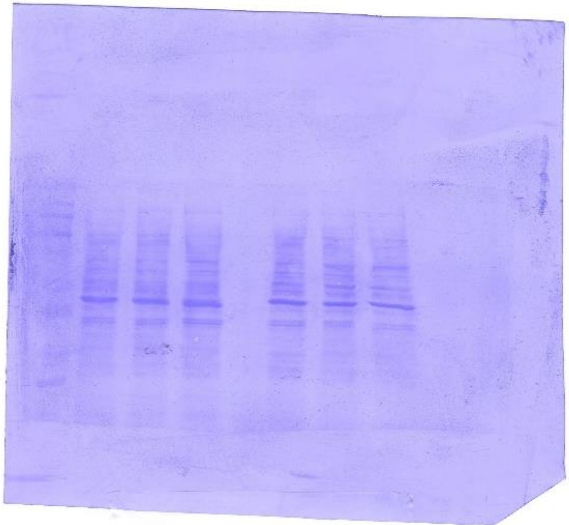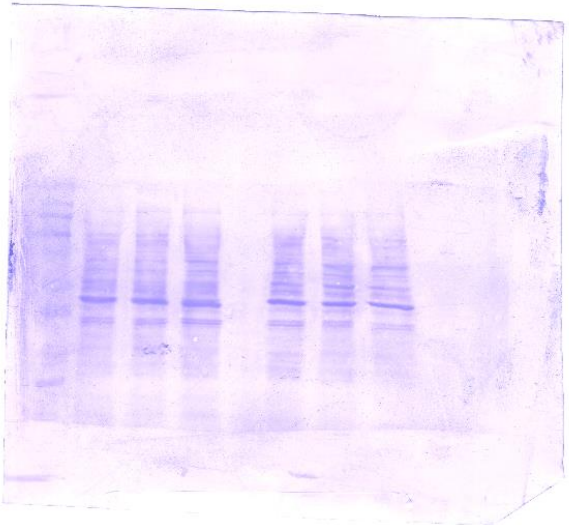



Supplementary figure 12.- Vinculin (Tamoxifen experiments)

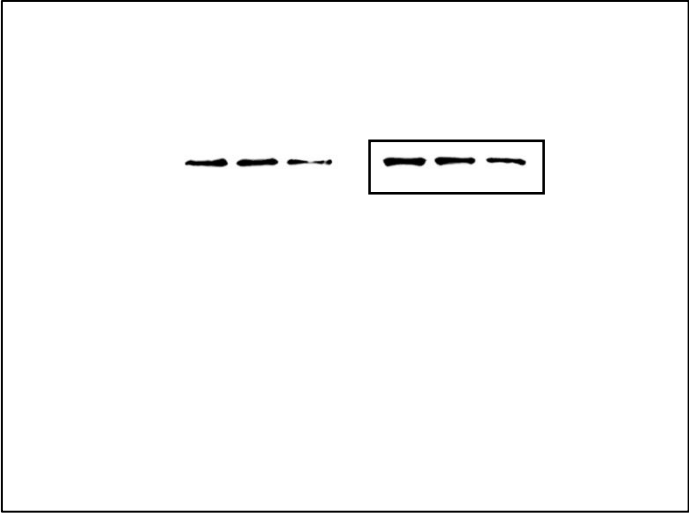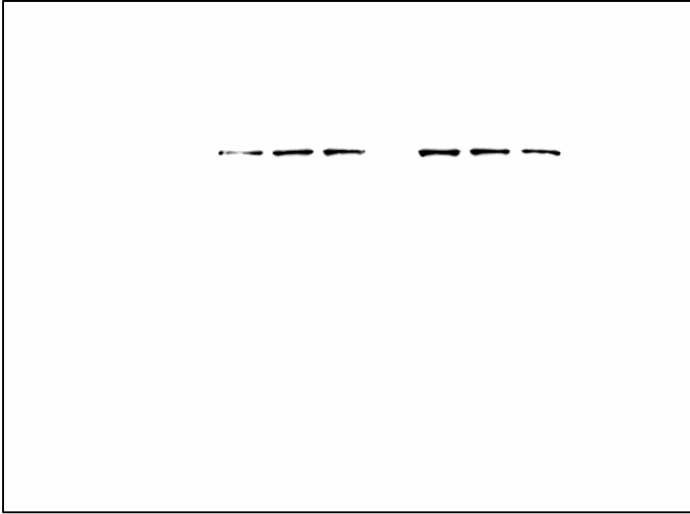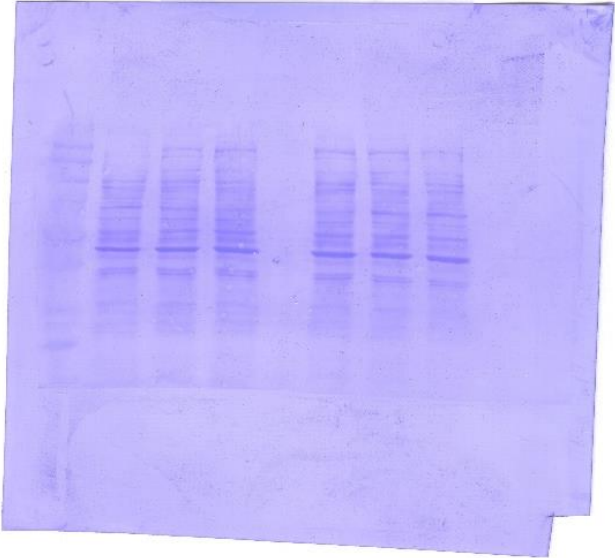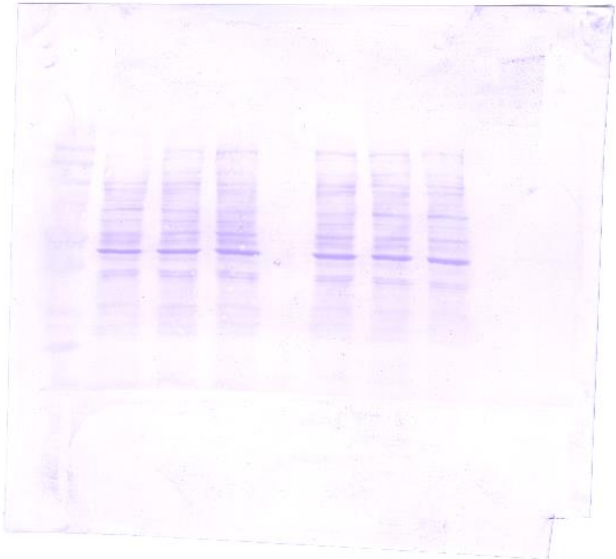

Supplementary figure 13.- E-cadherin (Tamoxifen experiments)

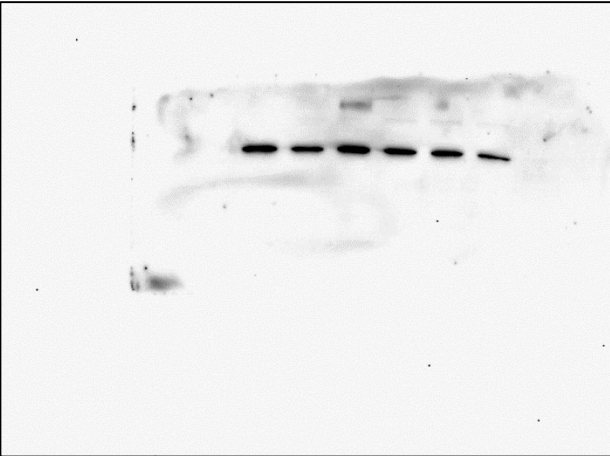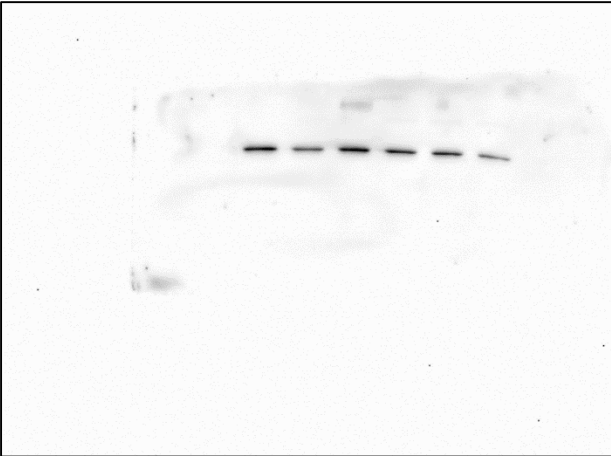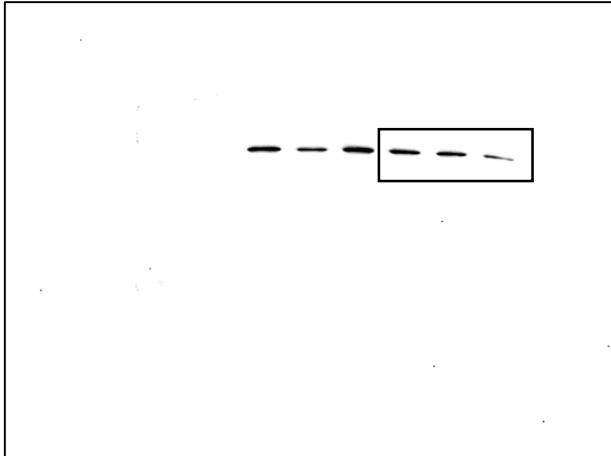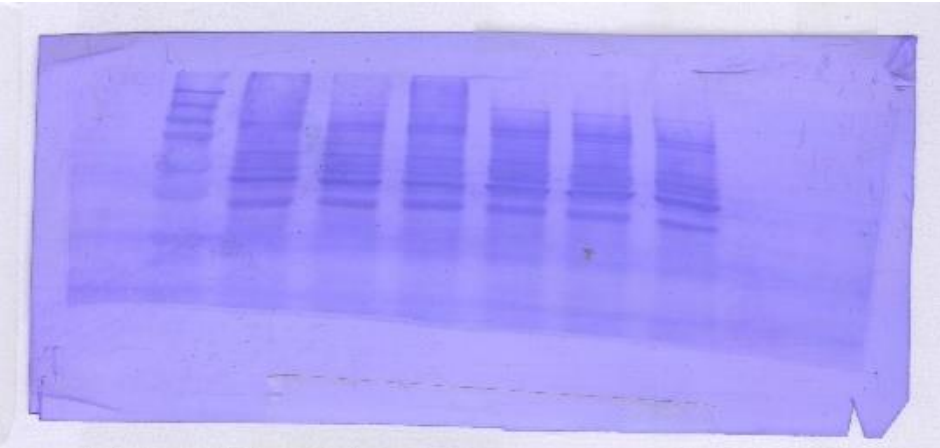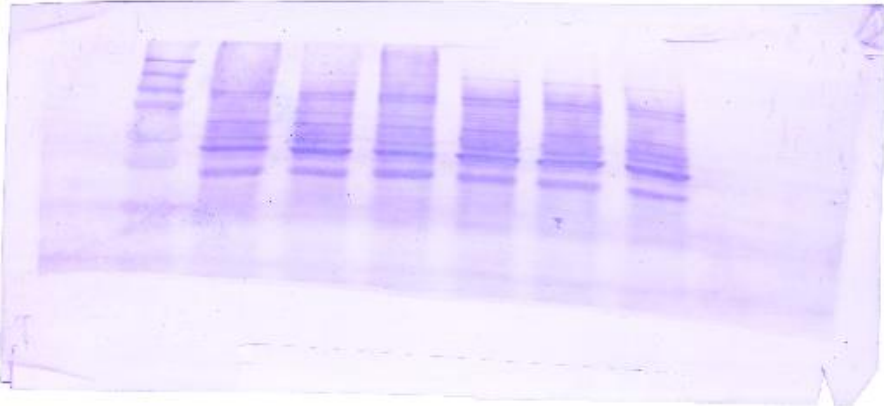

Supplementary figure 14.- Podocin (Tamoxifen experiments)

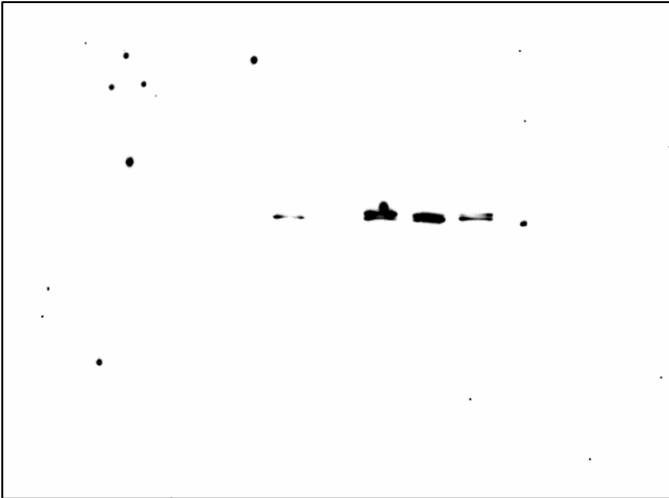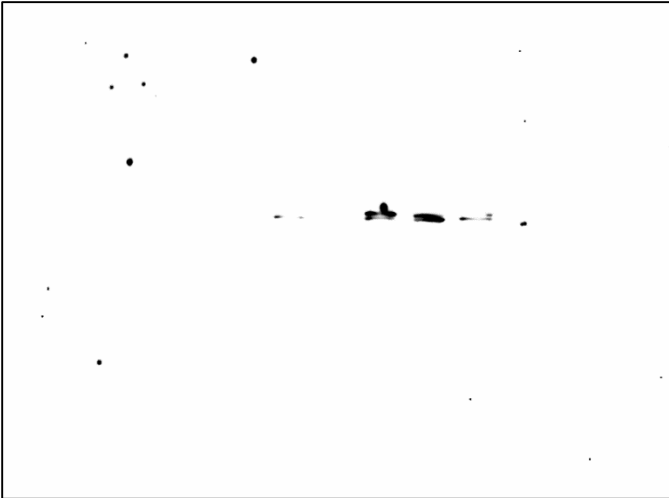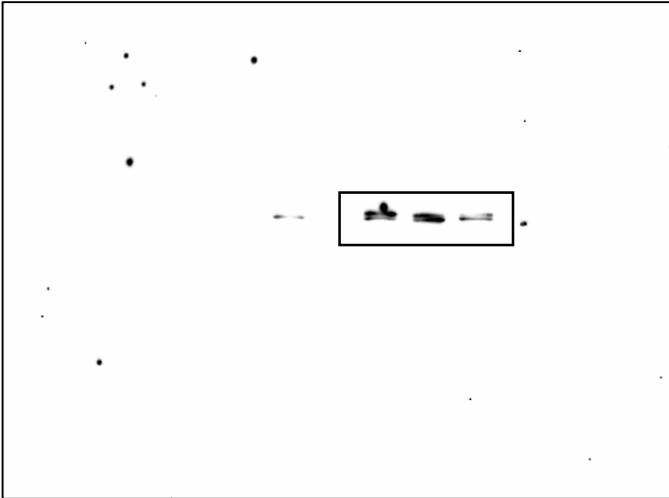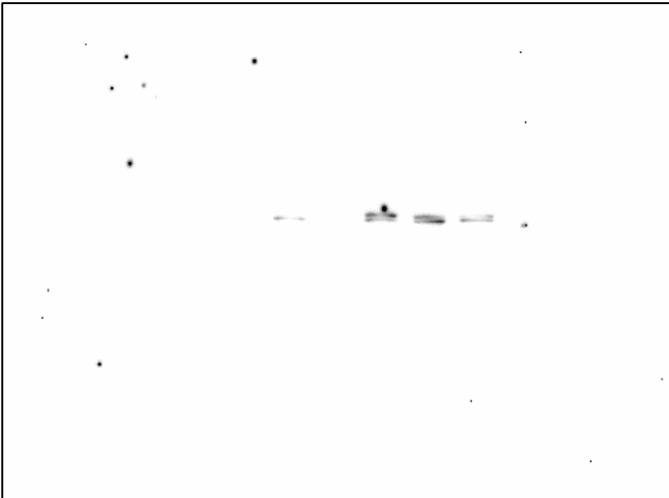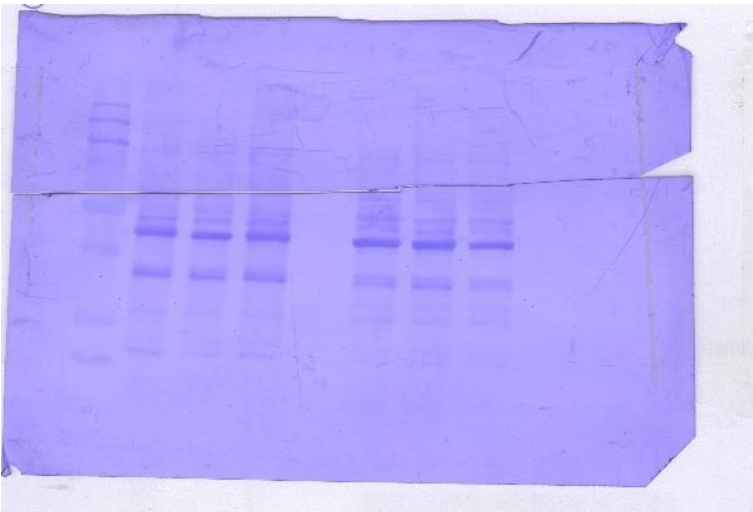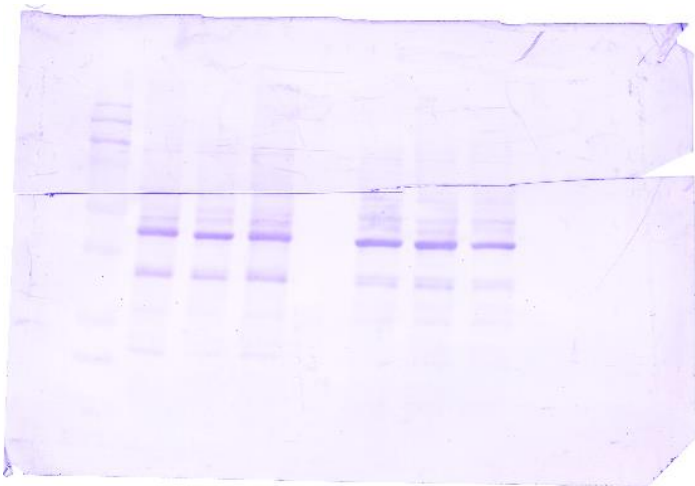

Supplementary figure 15.- Nephrin (Tamoxifen experiments)

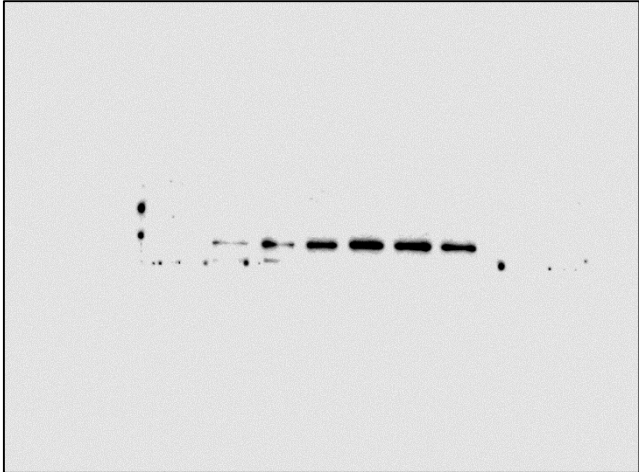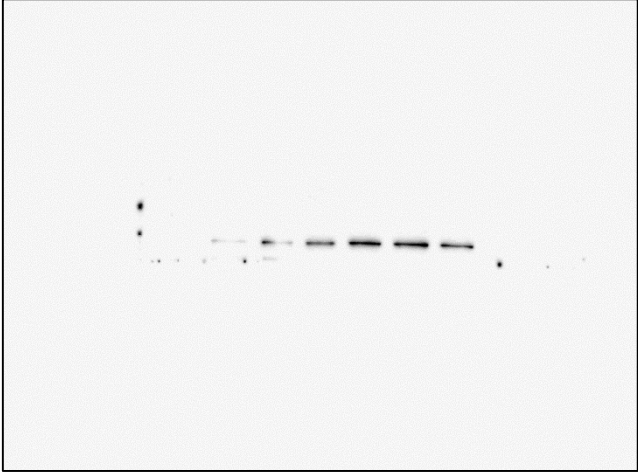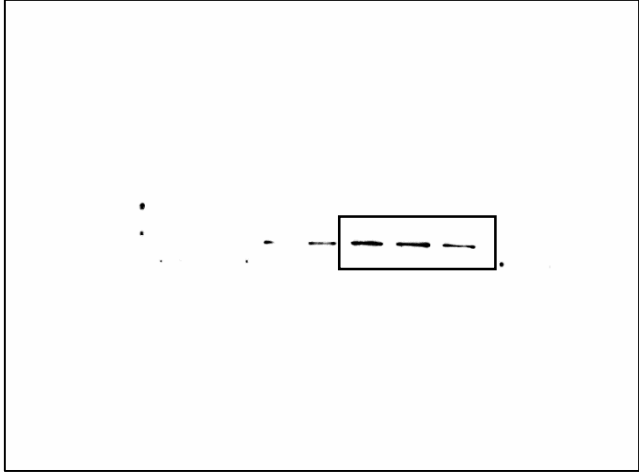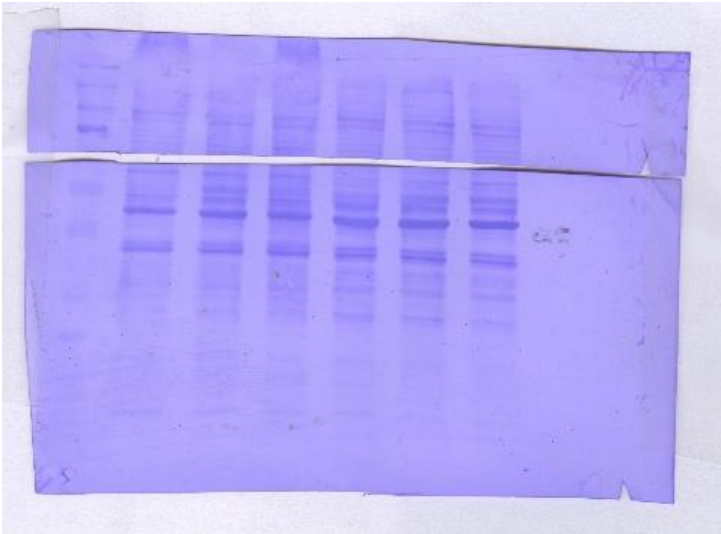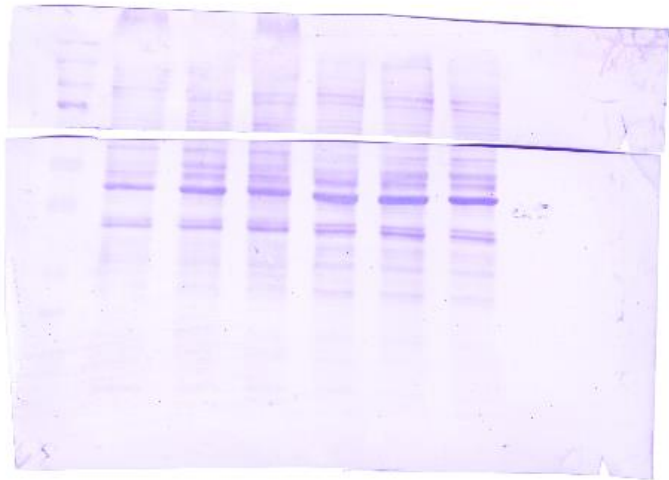

Supplement: 41598_2020_73636_MOESM1_ESM.pdf [file 41598_2020_73636_MOESM1_ESM.pdf]
